# Supplementary material
Source: PubMed Central journal article supplement (PMC5378525)
Supplement: supp_5.1.E40_2016-0126-2-at.pdf [file supp_5.1.E40_2016-0126-2-at.pdf]

Appendix 2 ( as supplied by the authors): Factors associated with cost-related nonadherence among Canadian respondents to the 2014 Commonwealth Fund International Health Policy Survey of Older Adults, unadjusted odds ratios

|                             | All ages                 | Age 55-64                | Age 65+                  |
|-----------------------------|--------------------------|--------------------------|--------------------------|
| Characteristics             | Odds Ratio (95% CI)      | Odds Ratio (95% CI)      | Odds Ratio (95% CI)      |
| <b>Age</b>                  |                          |                          |                          |
| 55-64                       | 3.32 (0.26, 5.20)        | -                        | -                        |
| Over 65                     | Reference                |                          |                          |
| <b>Sex</b>                  |                          |                          |                          |
| Male                        | 1.16 (0.92, 1.47)        | 0.77 (0.57, 1.04)        | 1.11 (0.74, 1.66)        |
| Female                      | Reference                | Reference                | Reference                |
| <b>Health Status</b>        |                          |                          |                          |
| Fair or Poor                | <b>2.22 (1.57, 2.96)</b> | <b>2.02 (1.42, 2.88)</b> | <b>2.62 (1.59, 4.31)</b> |
| Good                        | <b>1.71 (1.28, 2.29)</b> | <b>1.67 (1.15, 2.43)</b> | 1.62 (1.00, 2.63)        |
| Excellent & Very Good       | Reference                | Reference                | Reference                |
| <b>Income</b>               |                          |                          |                          |
| Low Income                  | <b>3.64 (2.41, 5.49)</b> | <b>5.55 (3.46, 8.84)</b> | <b>4.80 (1.54, 9.00)</b> |
| Average Income              | 1.57 (0.93, 2.48)        | 1.68 (0.33, 2.04)        | 1.93 (0.72, 5.15)        |
| High Income                 | Reference                | Reference                | Reference                |
| <b>Insurance</b>            |                          |                          |                          |
| No                          | <b>1.98 (1.56, 2.52)</b> | <b>2.66 (1.91, 3.58)</b> | <b>2.79 (1.73, 4.48)</b> |
| Yes                         | Reference                | Reference                | Reference                |
| <b>Province / Region</b>    |                          |                          |                          |
| British Columbia & Manitoba | 0.94 ( 0.67, 1.31)       | 1.32 (0.90, 1.90)        | <b>0.31 (0.12, 0.75)</b> |
| Alberta & Saskatchewan      | 0.65 (0.38, 1.20)        | 0.45 (0.25, 0.83)        | 0.93 (0.45, 1.91)        |
| Quebec                      | 0.89 (0.66, 1.20)        | 0.63 (0.42, 0.94)        | 1.47 (0.92, 2.35)        |
| Atlantic Provinces          | 1.09 (0.71, 1.66)        | 1.09 (0.53, 1.60)        | 1.45 (0.73, 2.87)        |
| Ontario                     | Reference                | -                        | -                        |
